# Supplementary material
Source: PubMed Central journal article supplement (PMC1622803)

**A** ○ Control

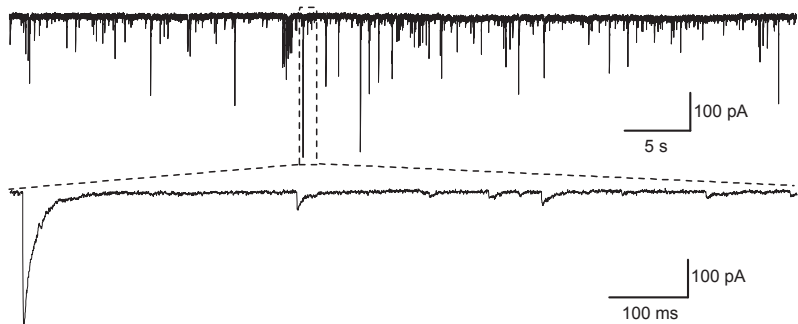

**B** ● Zinc

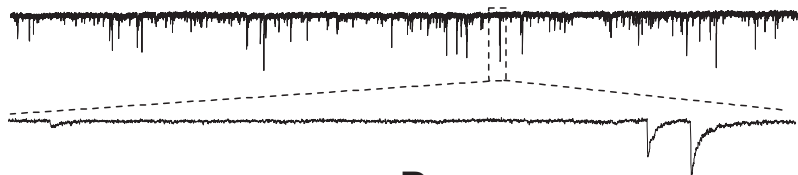

**C**

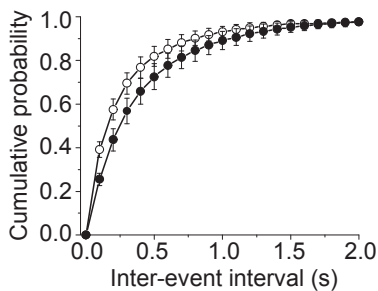

**D**

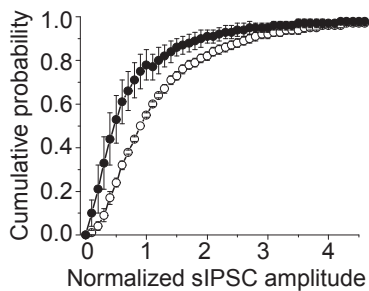

**E**

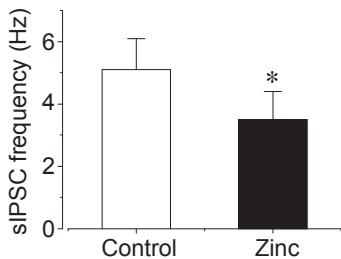

**F**

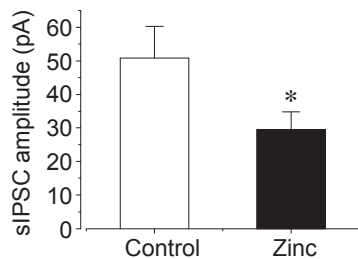

Supplement: pnas_0607131103_1.pdf [file pnas_0607131103_1.pdf]

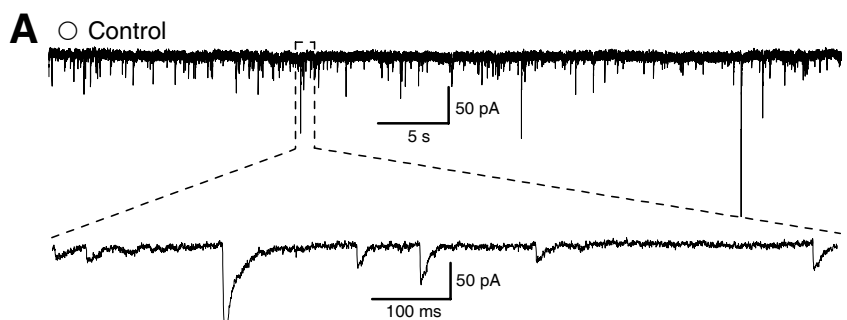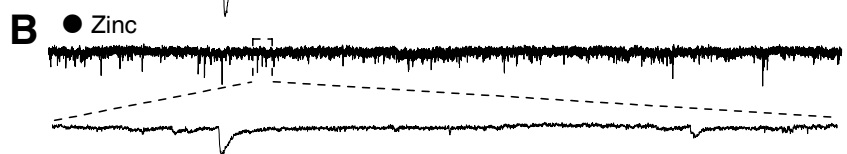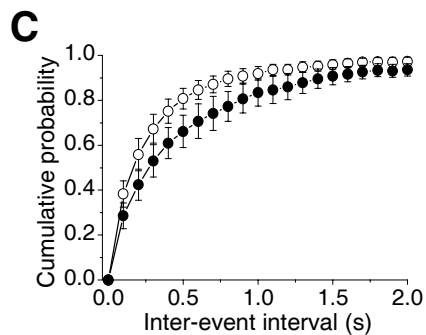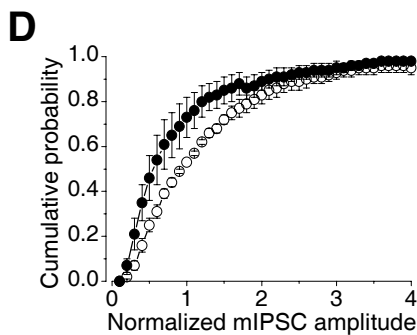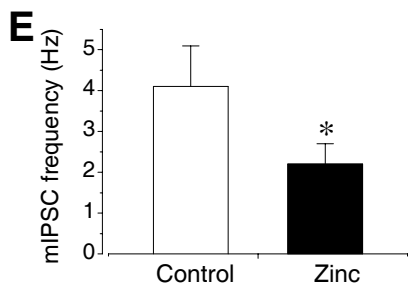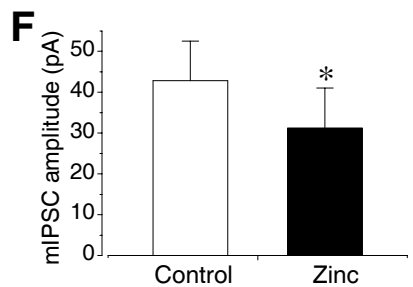

Supplement: pnas_0607131103_2.pdf [file pnas_0607131103_2.pdf]
